# Supplementary material for: Transcriptome and Metabolome Integration Reveals the Impact of Fungal Elicitors on Triterpene Accumulation in Sanghuangporus sanghuang
Source: MDPI journal article supplement (doi:10.3390/jof9060604), 2023-05-24
Supplement: s1 [file s1]

# Combined Metabolome and Transcriptome Analyses of the Effects of Elicitors Treated on Triterpene Accumulation in *Sanghuangporus sanghuang*

Linjiang Zhou <sup>1+</sup> • Yan Fu<sup>1+</sup> • Xinyuan Zhang <sup>1</sup> • Tong Wang <sup>1</sup> • Guangyuan Wang <sup>1</sup> •

Liwei Zhou <sup>2</sup> • Hailong Yu<sup>3,\*</sup> • Xuemei Tian <sup>1,\*</sup>

1 college of Life Sciences, Shandong Provincial Key Laboratory of Applied Mycology, Qingdao Agricultural University, Shandong Qingdao 266109, China; zhoulj24@163.com (L.J.Z.); xiaofu15662034968@163.com (Y.F.); 1172532789@qq.com (X.Y.Z.);

1173391395@qq.com (T.W.); gywang@qau.edu.cn (G.Y.W.)

2 State Key Laboratory of Mycology, Institute of Microbiology, Chinese Academy of Sciences, Beijing 100101, China; liwei\_zhou1982@im.ac.cn (L.W.Z.)

3 Institute of Edible Fungi, Shanghai Academy of Agricultural Sciences, National Engineering Research Center of Edible Fungi, Shanghai, 201403, China. yuhailong@saas.sh.cn (H.L.Y.)

<sup>+</sup> There authors contributed equally to the this work.

\* Corresponding author: txm@qau.edu.cn (X.M.T.), yuhailong@saas.sh.cn (H.L.Y.)

## Figure Legends

**Fig S1.** 18S internal reference gene. The left graph shows the amplification curve, and the right graph shows the dissolution curve.

**Fig S2.** Transcripts 20207. The left graph shows the amplification curve, and the right graph shows the dissolution curve.

**Fig S3.** Transcripts 20259. The left graph shows the amplification curve, and the right graph shows the dissolution curve.

**Fig S4.** Transcripts 41678. The left graph shows the amplification curve, and the right graph shows the dissolution curve.

**Fig S5.** Transcripts 4013. The left graph shows the amplification curve, and the right graph shows the dissolution curve.

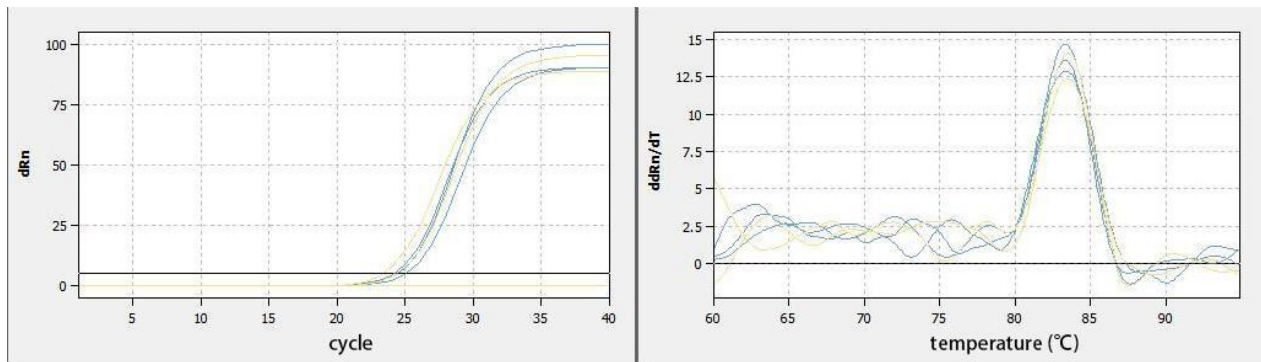

**Fig S1. 18S internal reference gene**

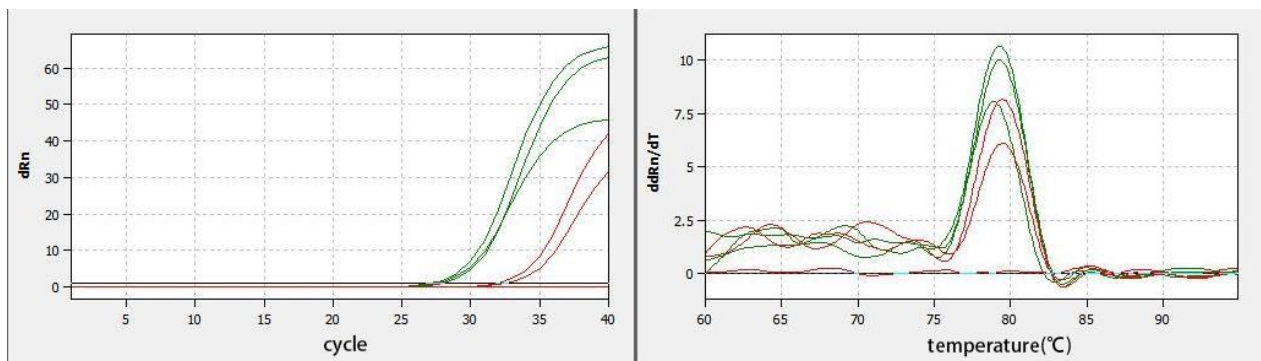

**Fig S2. Transcripts 20207**

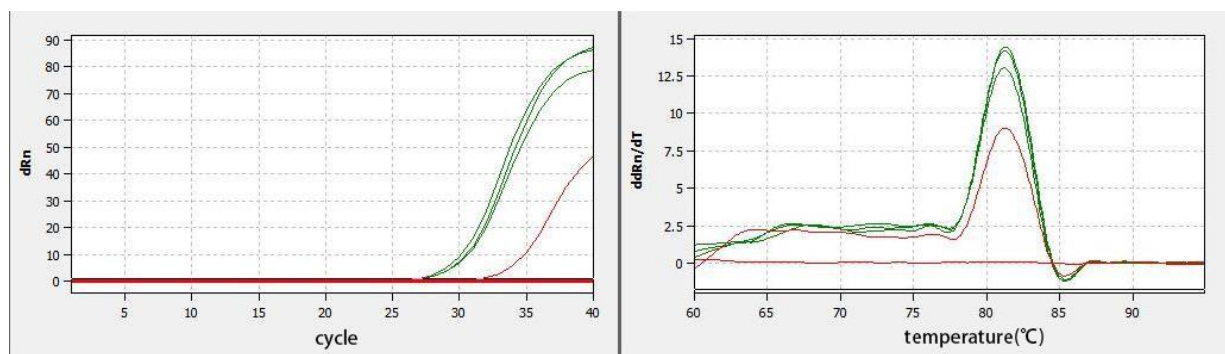

**Fig S3. Transcripts 20259**

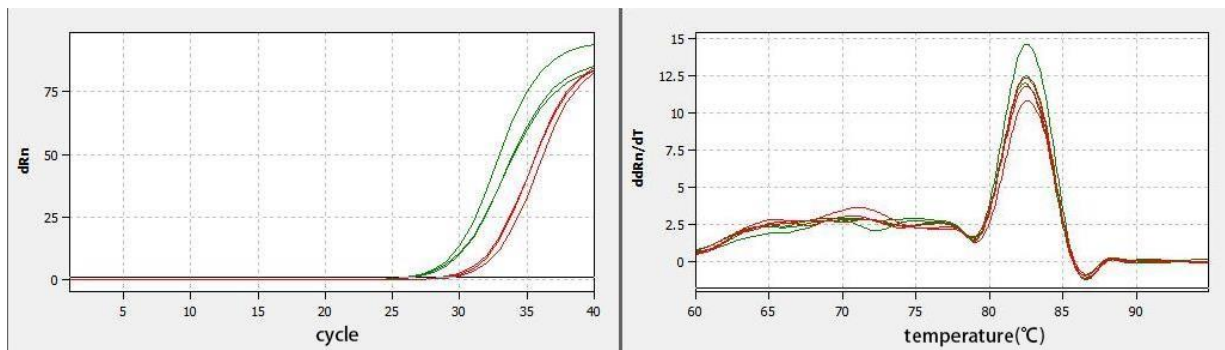

**Fig S4. Transcripts 41678**

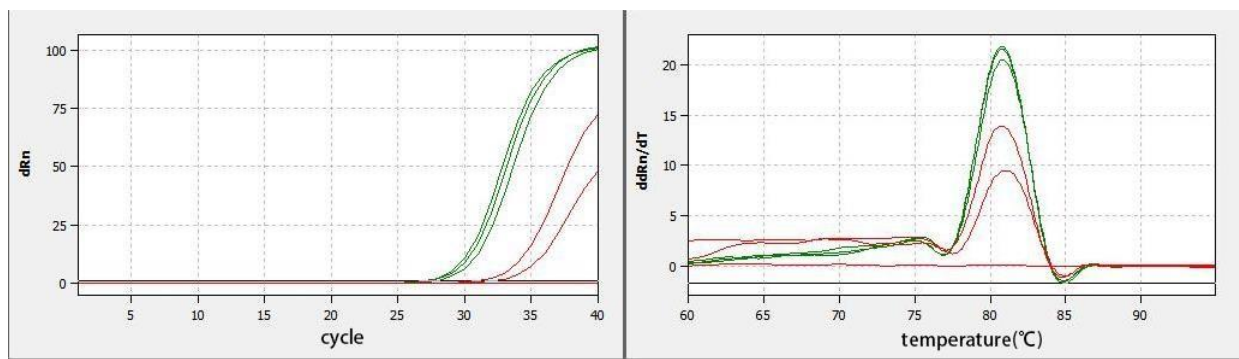

**Fig S5. Transcripts 4013**
